# Supplementary material for: Integrity of the Prefronto-striato-thalamo-prefrontal Loop Predicts Tai Chi Chuan Training Effects on Cognitive Task-switching in Middle-aged and Older Adults
Source: PubMed Central journal article supplement (PMC7917054; doi:10.3389/fnagi.2020.602191), 2021-02-15
Supplement: Table_1.pdf [file Table_1.pdf]

**Supplementary Table 1. Names of fiber tracts included in the four white matter fiber groups and their connected ROIs**

| <b>Names of fiber tracts</b>                    | <b>Connected ROIs</b>                      | <b>Connected ROIs</b>                                                 |
|-------------------------------------------------|--------------------------------------------|-----------------------------------------------------------------------|
| <b>PSTP loop fiber group</b>                    |                                            |                                                                       |
| 1. L FS <sub>DLPFC</sub>                        | L striatum                                 | L medial frontal gyrus + superior frontal gyrus                       |
| 2. L FS <sub>VLPFC</sub>                        | L striatum                                 | L inferior frontal gyrus + middle frontal gyrus                       |
| 3. L TR <sub>DLPFC</sub>                        | L thalamus                                 | L medial frontal gyrus + superior frontal gyrus + SMA                 |
| 4. L TR <sub>VLPFC</sub>                        | L thalamus                                 | L orbitofrontal gyrus + middle frontal gyrus + inferior frontal gyrus |
| 5. R FS <sub>DLPFC</sub>                        | R striatum                                 | R medial frontal gyrus + superior frontal gyrus                       |
| 6. R FS <sub>VLPFC</sub>                        | R striatum                                 | R inferior frontal gyrus + middle frontal gyrus                       |
| 7. R TR <sub>DLPFC</sub>                        | R thalamus                                 | R medial frontal gyrus + superior frontal gyrus + SMA                 |
| 8. R TR <sub>VLPFC</sub>                        | R thalamus                                 | R orbitofrontal gyrus + middle frontal gyrus + inferior frontal gyrus |
| <b>Prefronto-parietal/occipital fiber group</b> |                                            |                                                                       |
| 1. L SLF I                                      | L superior frontal gyrus                   | L precuneus                                                           |
| 2. L SLF II                                     | L inferior frontal gyrus pars triangularis | L middle occipital gyrus                                              |
| 3. L SLF III                                    | L inferior frontal gyrus pars opercularis  | L angular gyrus                                                       |
| 4. L IFOF                                       | L orbitofrontal gyrus                      | L occipital lobe                                                      |
| 5. R SLF I                                      | R superior frontal gyrus                   | R precuneus                                                           |
| 6. R SLF II                                     | R inferior frontal gyrus pars triangularis | R middle occipital gyrus                                              |
| 7. R SLF III                                    | R inferior frontal gyrus pars opercularis  | R angular gyrus                                                       |

---

|                                                    |                          |                                                 |                                                 |
|----------------------------------------------------|--------------------------|-------------------------------------------------|-------------------------------------------------|
| 8.                                                 | R IFOF                   | R orbitofrontal gyrus                           | R occipital lobe                                |
| <b>Prefronto/parietal CFs group</b>                |                          |                                                 |                                                 |
| 1.                                                 | CF <sub>OFG</sub>        | L orbitofrontal gyrus                           | R orbitofrontal gyrus                           |
| 2.                                                 | CF <sub>DLPFC</sub>      | L medial frontal gyrus + superior frontal gyrus | R medial frontal gyrus + superior frontal gyrus |
| 3.                                                 | CF <sub>VLPFC</sub>      | L inferior frontal gyrus + middle frontal gyrus | R inferior frontal gyrus + middle frontal gyrus |
| 4.                                                 | CF <sub>SPL</sub>        | L superior parietal lobules                     | R superior parietal lobules                     |
| 5.                                                 | CF <sub>IPL</sub>        | L inferior parietal lobules                     | R inferior parietal lobules                     |
| <b>Reference fiber group: Auditory fiber group</b> |                          |                                                 |                                                 |
| 1.                                                 | L TR <sub>auditory</sub> | L thalamus                                      | L Heschl's gyrus                                |
| 2.                                                 | R TR <sub>auditory</sub> | R thalamus                                      | R Heschl's gyrus                                |

---

The table is adapted from Chen et al. (2015). Abbreviations: CFs, callosal fibers; CST, corticospinal tract; DLPFC, dorsolateral prefrontal cortex; FS, fronto-striatal; IFOF, inferior fronto-occipital fasciculus; IPL, inferior parietal lobules; L, left; OFG, orbitofrontal gyrus; PSTP, prefronto-striato-thalamo-prefrontal; R, right; ROIs, regions of interest; SLF, superior longitudinal fasciculus; SPL, superior parietal lobules; SMA, supplementary motor area; TR, thalamic radiation; VLPFC, ventrolateral prefrontal cortex.
