# Supplementary material for: Integrity of the Prefronto-striato-thalamo-prefrontal Loop Predicts Tai Chi Chuan Training Effects on Cognitive Task-switching in Middle-aged and Older Adults
Source: PubMed Central journal article supplement (PMC7917054; doi:10.3389/fnagi.2020.602191), 2021-02-15
Supplement: Table_2.pdf [file Table_2.pdf]

**Supplementary Table 2. Partial correlations of the GFA values of the PSTP loop, prefronto-parietal/occipital, prefrontal/parietal CFs, and auditory fiber groups with normalized changes of the number of total errors of the IED test for the TCC and CON groups**

|           | PSTP group            | Prefronto-parietal/occipital tracts | Prefrontal/parietal CFs | Auditory tracts      |
|-----------|-----------------------|-------------------------------------|-------------------------|----------------------|
| TCC group | r= -0.63<br>p= 0.009* | r= -0.55<br>p= 0.026                | r= -0.35<br>p= 0.189    | r= -0.07<br>p= 0.810 |
| CON group | r= 0.18<br>p= 0.497   | r= -0.03<br>p= 0.911                | r= 0.14<br>p= 0.619     | r= 0.27<br>p= 0.408  |

CFs, callosal fibers; CON, control group; GFA, generalized fractional anisotropy; IED, Intra-Extra Dimensional Set Shift; PSTP, prefronto-striato-thalamo-prefrontal; TCC, Tai Chi Chuan group. \*  $p < 0.0125$  (= 0.05/4 adjusted): significant correlations.
