# Supplementary material for: Integrity of the Prefronto-striato-thalamo-prefrontal Loop Predicts Tai Chi Chuan Training Effects on Cognitive Task-switching in Middle-aged and Older Adults
Source: PubMed Central journal article supplement (PMC7917054; doi:10.3389/fnagi.2020.602191), 2021-02-15
Supplement: Table_3.pdf [file Table_3.pdf]

**Supplementary Table 3. Demographics of the TCC and CON groups at baseline for the female participants (n=33)**

|                                            | <b>TCC (n = 15)</b><br><b>mean (SD)</b> | <b>CON (n = 18)</b><br><b>mean (SD)</b> | <b>p-value</b> |
|--------------------------------------------|-----------------------------------------|-----------------------------------------|----------------|
| Age (year)                                 | 63.4 (4.3)                              | 63.4 (4.4)                              | 0.972          |
| Sex (female : male)                        | 15:0                                    | 18:0                                    | -              |
| Hypertension (yes : no) <sup>a</sup>       | 2:13                                    | 6:12                                    | 0.182          |
| Dyslipidemia (yes : no) <sup>a</sup>       | 2:13                                    | 1:17                                    | 0.439          |
| Diabetes type II (yes : no) <sup>a</sup>   | 1:14                                    | 3:15                                    | 0.381          |
| Number of CVD risks (0:1:2) <sup>a</sup>   | 11:3:1                                  | 10:6:2                                  | 0.572          |
| CVD drug dosage (tablets/day) <sup>b</sup> | 0.4 (0.7)                               | 0.6 (0.9)                               | 0.323          |
| SBP (mmHg)                                 | 118.7 (8.8)                             | 118.3 (15.5)                            | 0.942          |
| DBP (mmHg)                                 | 78.9 (11.9)                             | 76.2 (10.1)                             | 0.484          |
| Education (year) <sup>b</sup>              | 13.3 (2.2)                              | 13.4 (2.5)                              | 0.686          |
| Body mass index (kg/m <sup>2</sup> )       | 22.8 (2.6)                              | 22.7 (3.3)                              | 0.950          |
| MoCA (score) <sup>b</sup>                  | 28.3 (1.5)                              | 28.6 (1.3)                              | 0.602          |
| GDS-15 (score) <sup>b</sup>                | 1.5 (1.7)                               | 1.7 (1.5)                               | 0.503          |
| PASE (score) <sup>b</sup>                  | 53.0 (41.7)                             | 51.1 (43.8)                             | 0.928          |

<sup>a</sup> Chi-square tests to test between-group differences in sex, CVD risks, hypertension, dyslipidemia, and diabetes.

<sup>b</sup> Mann-Whitney U tests to test between-group differences in education, MoCA, GDS-15, and PASE.

CON, control group; CVD, cardiovascular disease; DBP, diastolic blood pressure; GDS-15, Geriatric Depression Scale 15-item Short-form; MoCA, Montreal Cognitive Assessment; PASE, Physical Activity Scale for the Elderly; SBP, systolic blood pressure; SD, standard deviation; TCC, Tai Chi Chuan group.
