# Supplementary material for: Integrity of the Prefronto-striato-thalamo-prefrontal Loop Predicts Tai Chi Chuan Training Effects on Cognitive Task-switching in Middle-aged and Older Adults
Source: PubMed Central journal article supplement (PMC7917054; doi:10.3389/fnagi.2020.602191), 2021-02-15
Supplement: Table_4.pdf [file Table_4.pdf]

**Supplementary Table 4. Behavioral performances of the TCC and CON groups at pre- and post-tests for the female participants (n=33)**

|                                | TCC group (n=15)   |                     |                          | CON group (n=18)   |                     |                          | Between-group differences at pre-test | Between-group differences at post-test |
|--------------------------------|--------------------|---------------------|--------------------------|--------------------|---------------------|--------------------------|---------------------------------------|----------------------------------------|
|                                | Pre-test mean (SD) | Post-test mean (SD) | Within-group differences | Pre-test mean (SD) | Post-test mean (SD) | Within-group differences |                                       |                                        |
| <b>Task-switching function</b> |                    |                     |                          |                    |                     |                          |                                       |                                        |
| IED <sub>errors</sub>          | 27.9<br>(13.2)     | 17.6<br>(9.8)       | 0.010*                   | 25.8<br>(15.8)     | 28.2<br>(13.9)      | 0.086                    | 0.717                                 | 0.023                                  |
| <b>Physical functions</b>      |                    |                     |                          |                    |                     |                          |                                       |                                        |
| Knee extensor strength (kg)    | 21.4<br>(5.3)      | 28.6<br>(6.4)       | <0.001 <sup>†</sup>      | 22.7<br>(3.8)      | 24.6<br>(3.7)       | 0.023                    | 0.429                                 | 0.030                                  |
| 6MWT (m)                       | 457.4<br>(65.6)    | 502.0<br>(63.0)     | 0.001 <sup>‡</sup>       | 489.1<br>(49.4)    | 485.1<br>(48.1)     | 0.600                    | 0.193                                 | 0.286                                  |

6MWT, Six-Minute Walk Test; CON, control group; IED<sub>errors</sub>, total errors of Intra/Extra-dimensional set shift test; SD, standard deviation; TCC, Tai Chi Chuan group.

\* $p < 0.025$ : significant within-group differences between pre- and post-test IED<sub>errors</sub> using Wilcoxon signed-rank tests for the TCC group.

<sup>†</sup> $p < 0.0125$ : significant within-group differences between pre- and post-test knee extensor strength using paired-t test for the TCC group.

<sup>‡</sup> $p < 0.0125$ : significant within-group differences between pre- and post-test 6MWT using Wilcoxon signed-rank test for the TCC group.
