# Supplementary material for: Integrity of the Prefronto-striato-thalamo-prefrontal Loop Predicts Tai Chi Chuan Training Effects on Cognitive Task-switching in Middle-aged and Older Adults
Source: PubMed Central journal article supplement (PMC7917054; doi:10.3389/fnagi.2020.602191), 2021-02-15
Supplement: Table_5.pdf [file Table_5.pdf]

**Supplementary Table 5. Final model of multiple linear regression analysis results on predictors of the normalized changes of IED<sub>errors</sub> after TCC training for the female participants (n=33)**

|                                     | Unstandardized coefficients |                | Standardized coefficients |         | Adjusted R <sup>2</sup> | Adjusted R <sup>2</sup> change | F     | p-value |
|-------------------------------------|-----------------------------|----------------|---------------------------|---------|-------------------------|--------------------------------|-------|---------|
|                                     | B                           | Standard error | Beta                      | p-value |                         |                                |       |         |
| Constant                            | 7.733                       | 3.825          |                           | 0.068   |                         |                                |       |         |
| Covariates                          |                             |                |                           |         |                         |                                |       |         |
| Age                                 | -0.036                      | 0.027          | -0.446                    | 0.207   |                         |                                |       |         |
| Education                           | -0.063                      | 0.044          | -0.405                    | 0.179   |                         |                                |       |         |
| GFA <sub>pre</sub> of the PSTP loop | -10.393                     | 4.576          | -0.748                    | 0.044*  | 0.152                   | 0.313                          | 5.157 | 0.044*  |

GFA<sub>pre</sub>, generalized fractional anisotropy at baseline; IED<sub>errors</sub>, the number of total errors of the Intra/Extra-dimensional set shift test; PSTP, prefronto-striatal-thalamo-prefrontal; TCC, Tai Chi Chuan group. Normalized change of IED<sub>errors</sub> = (post-test IED<sub>errors</sub> - pre-test IED<sub>errors</sub>) / pre-test IED<sub>errors</sub>.

The stepwise method was applied, using the criteria of p(F) < 0.05 as the probability-to-enter and p(F) ≥ 0.10 as probability-to-remove. Age and education were entered as covariates.

\* p < 0.05.
